# Supplementary material
Source: PubMed Central journal article supplement (PMC6179148)
Supplement: NIHMS976524-supplement-figures.pdf [file NIHMS976524-supplement-figures.pdf]

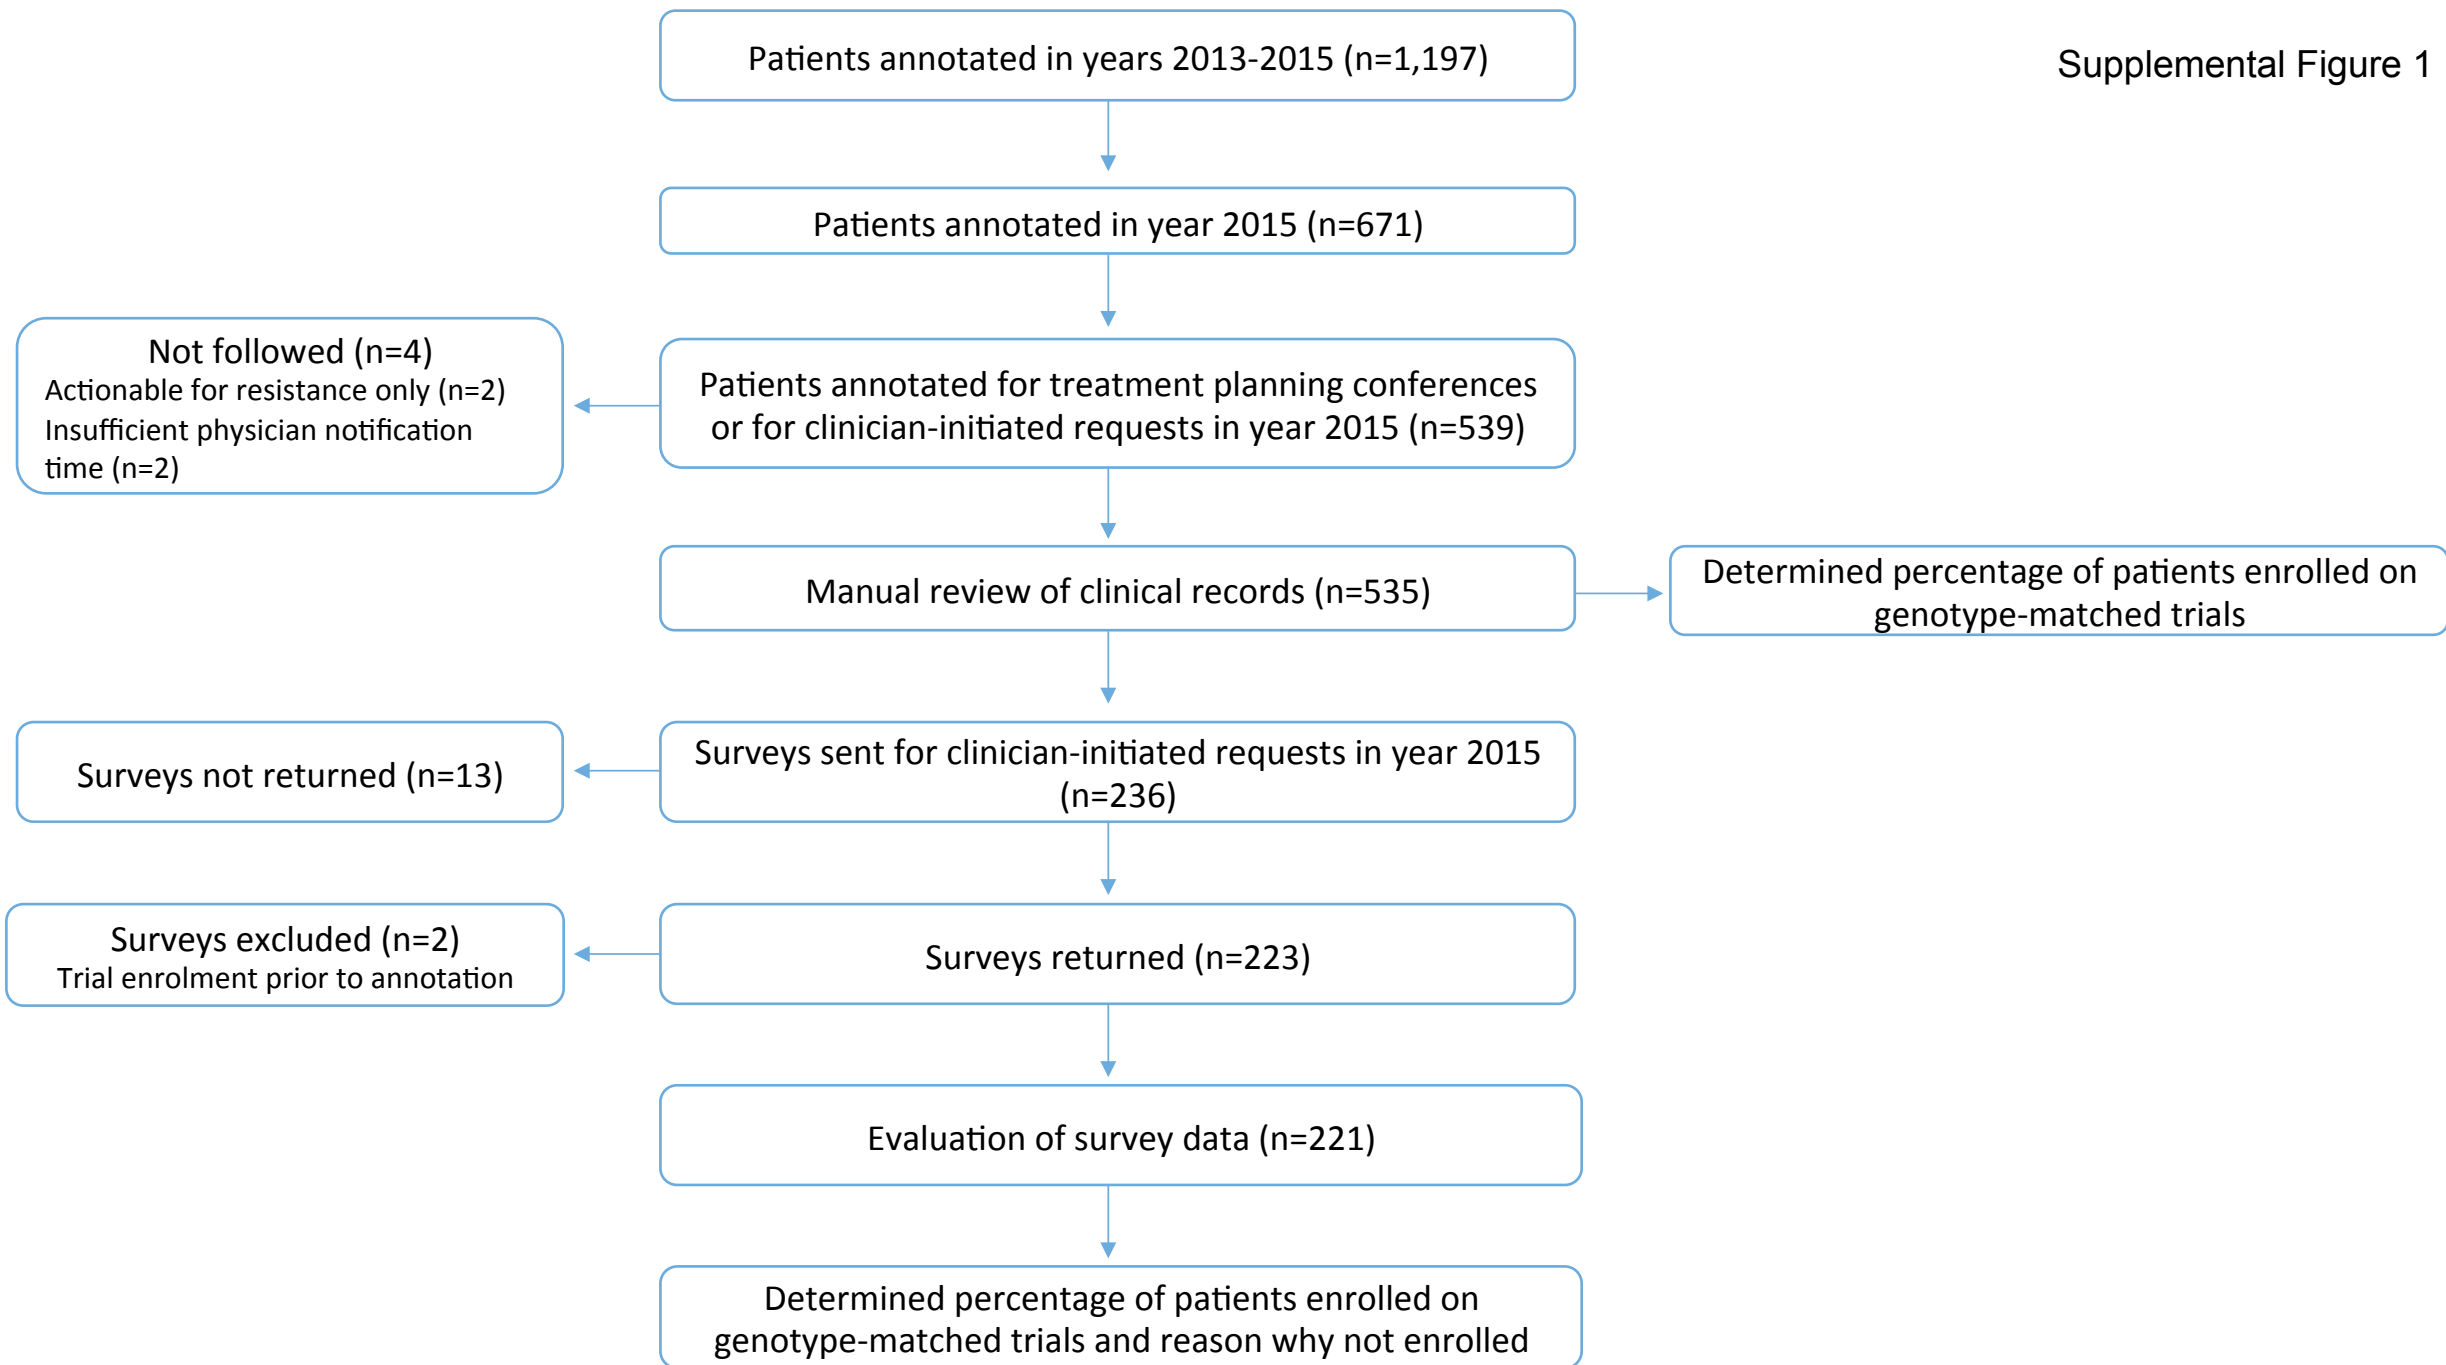

A

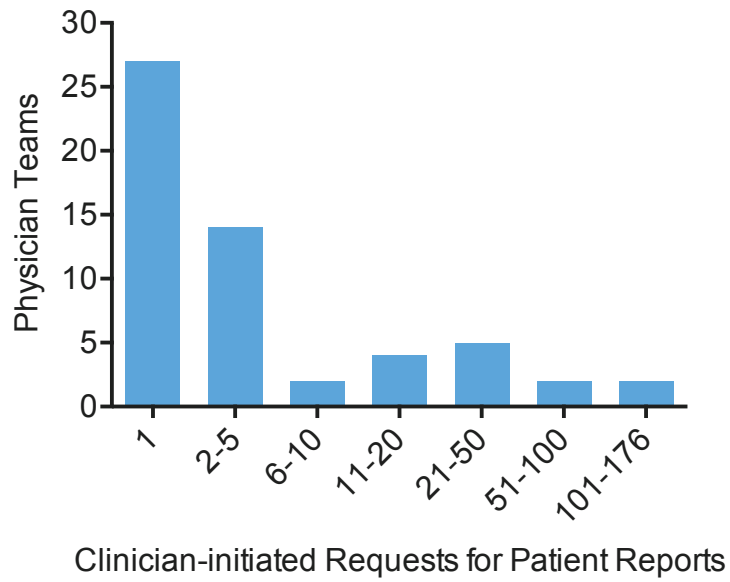

B

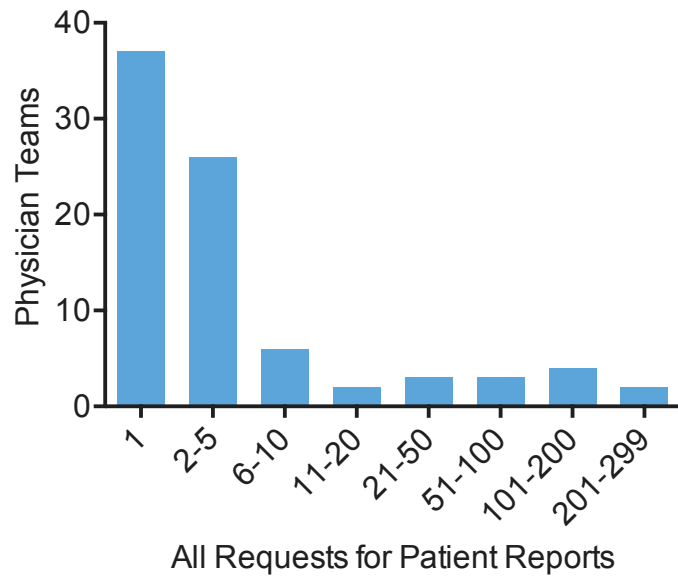

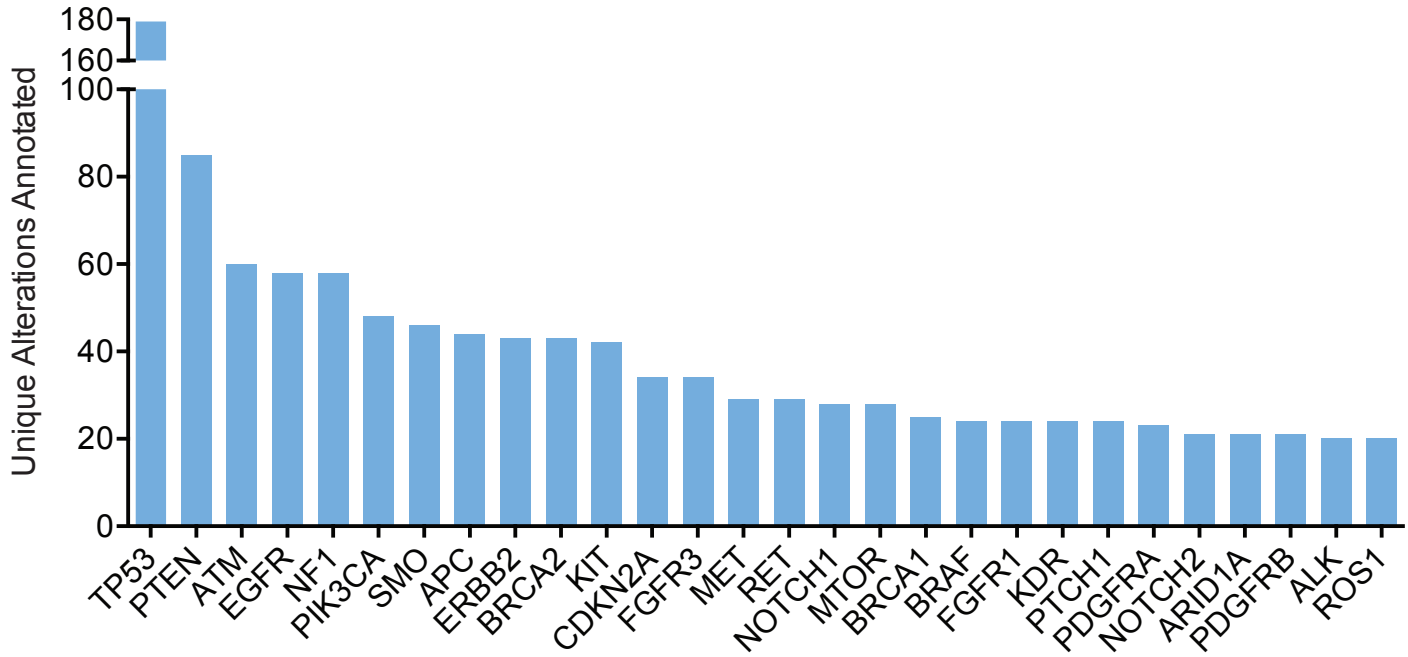

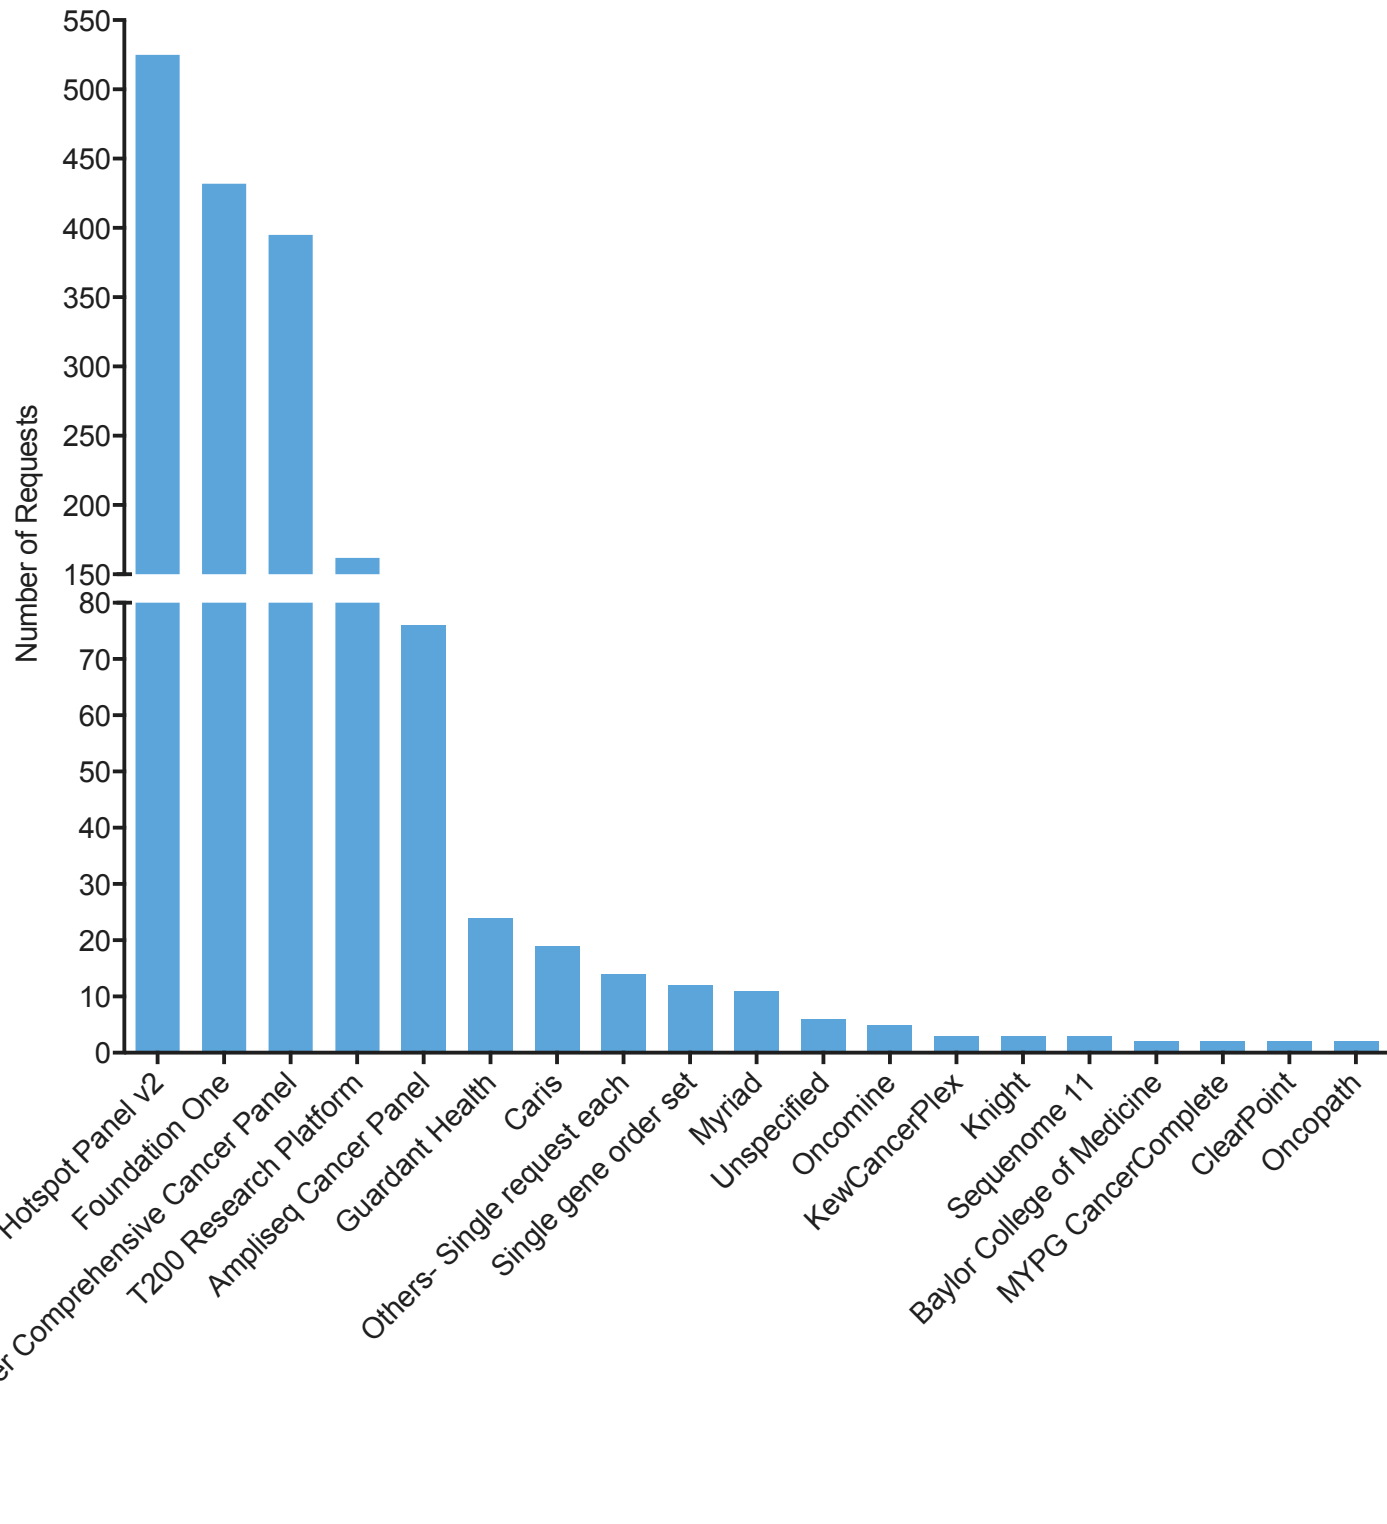

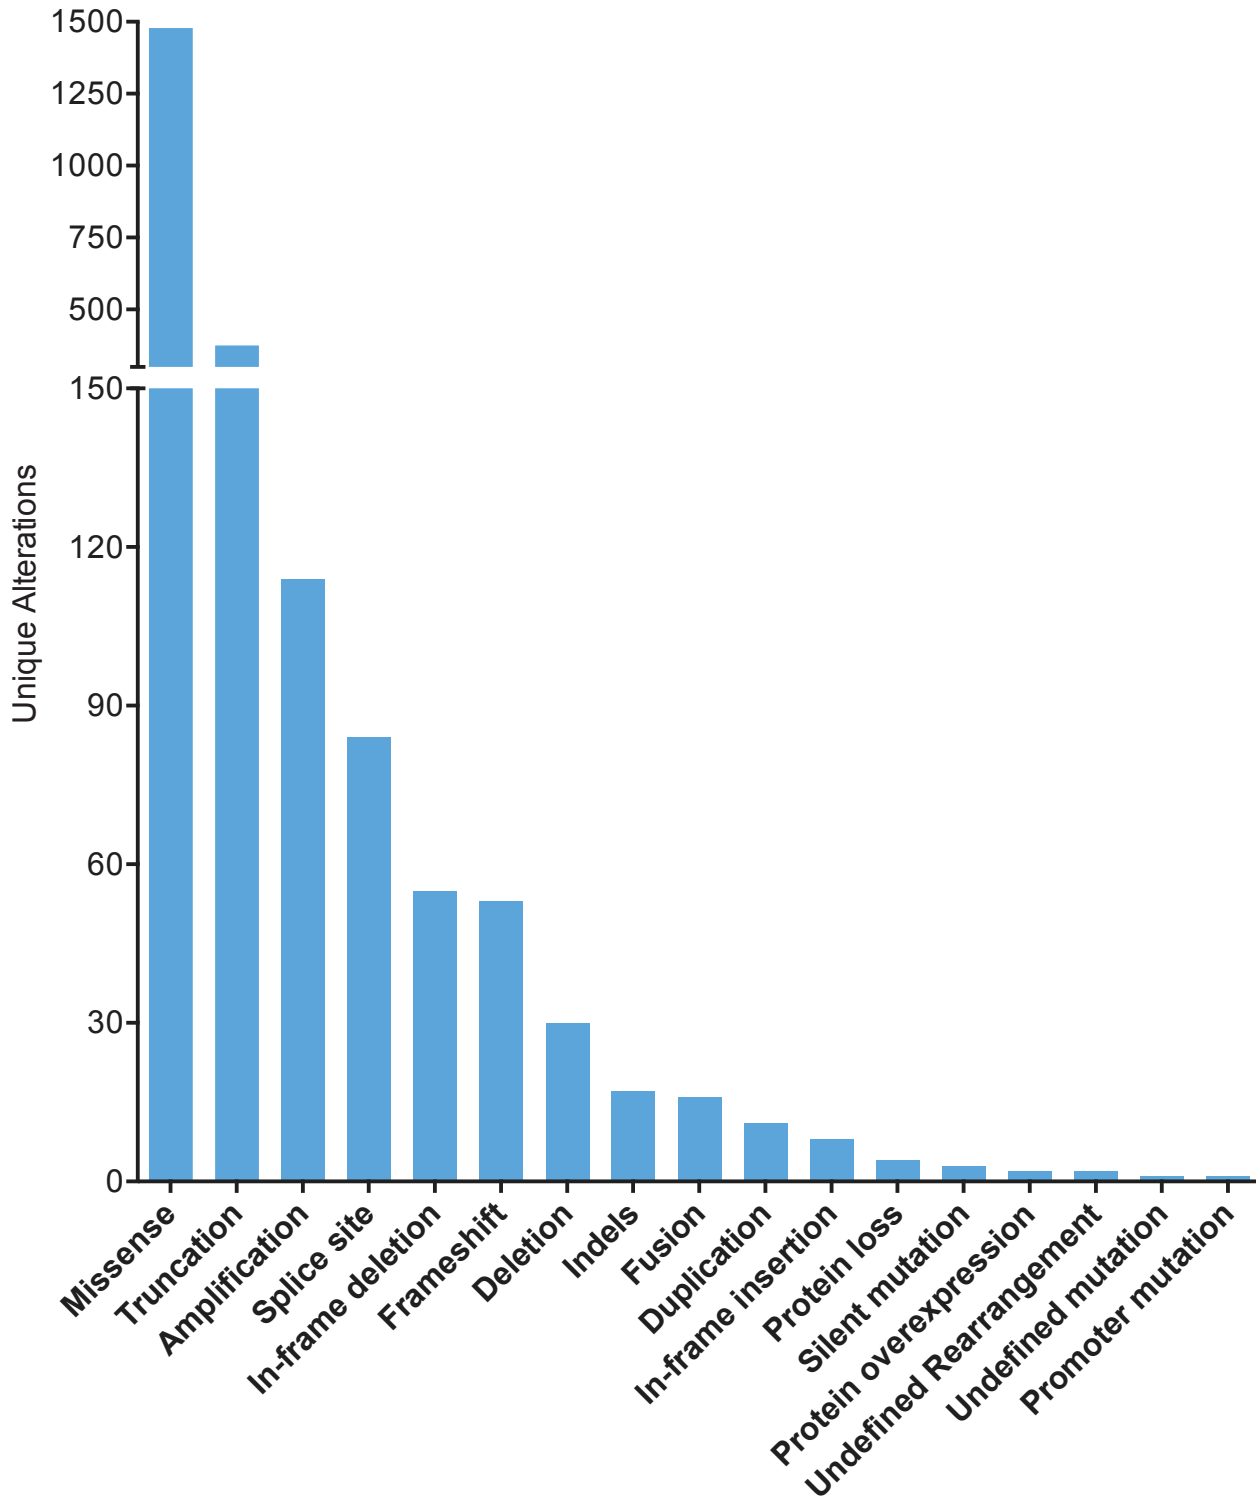

A

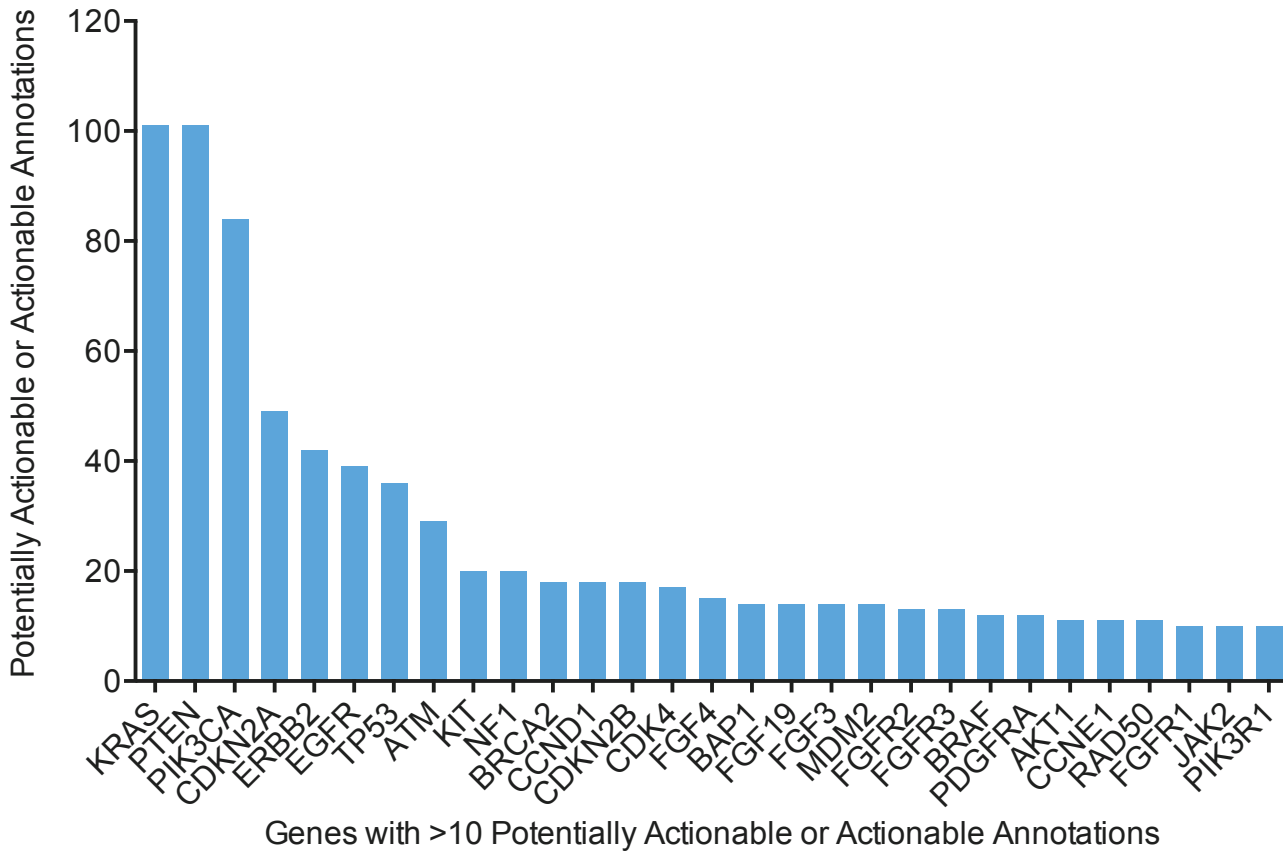

B

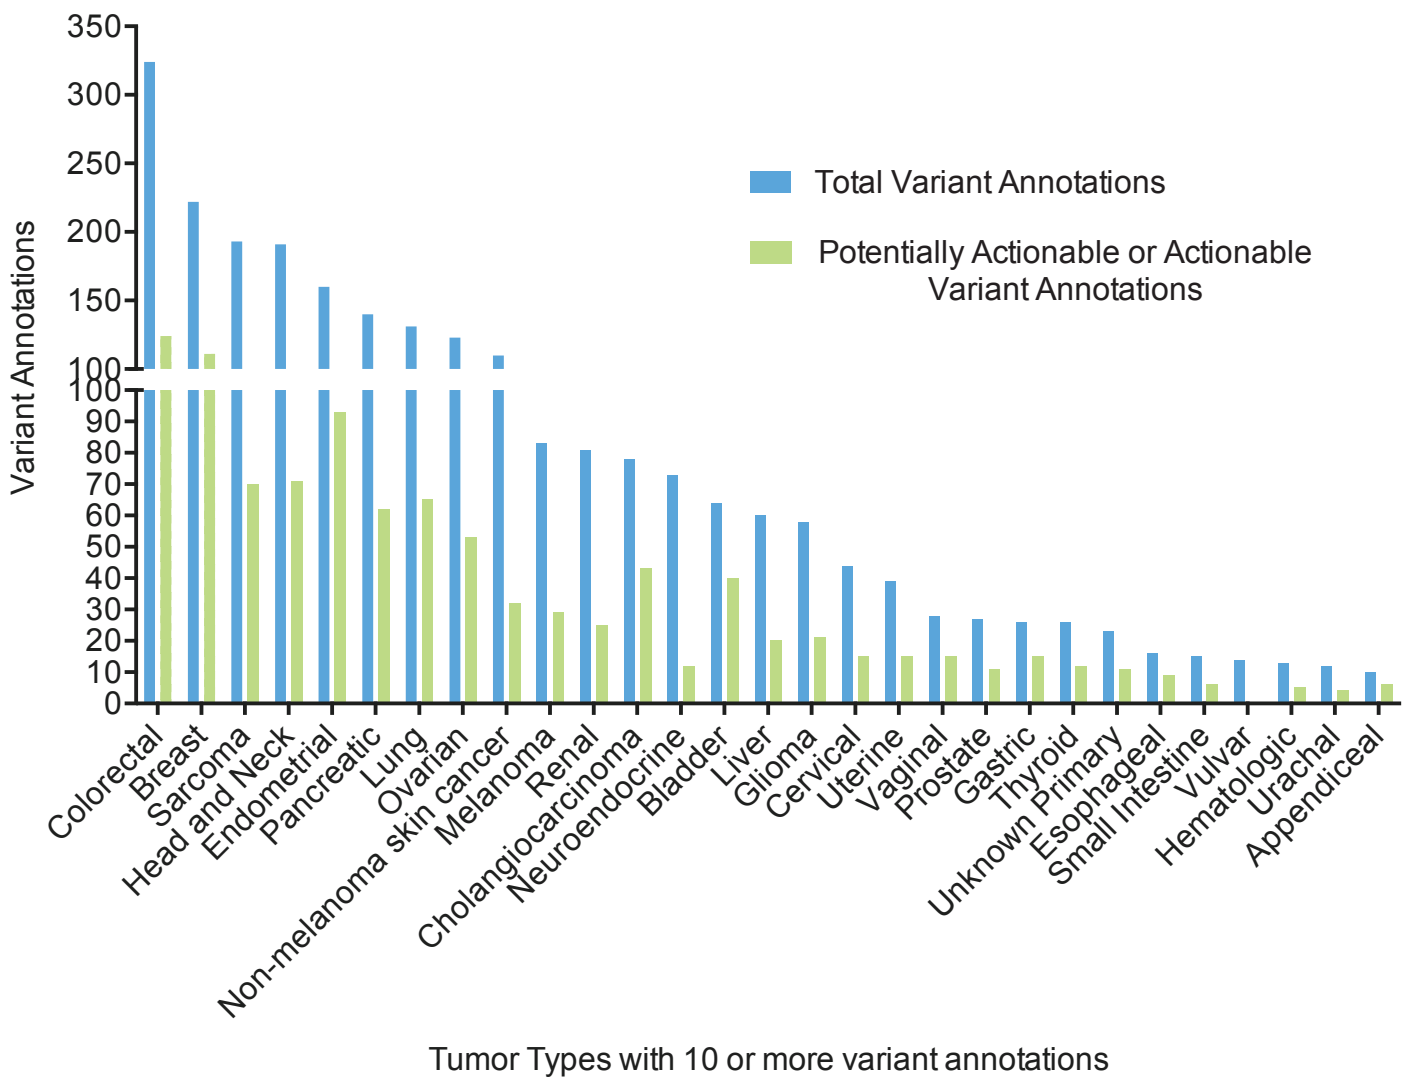

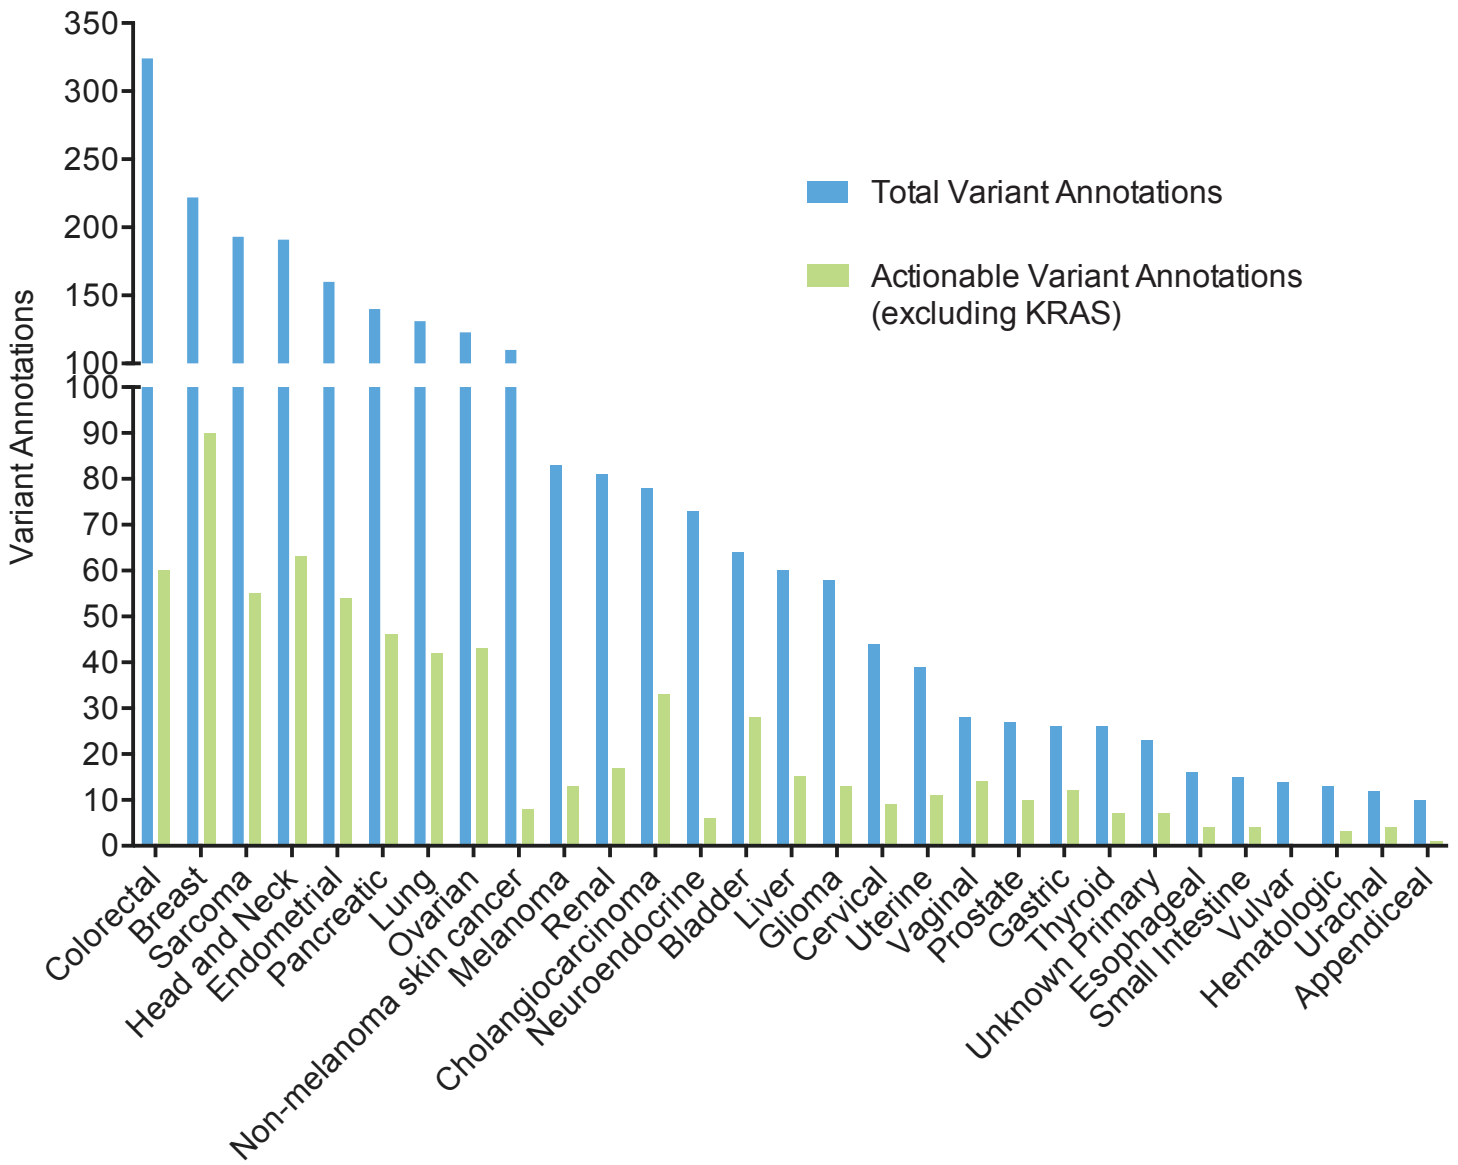

Tumor types with 10 or more variant annotations

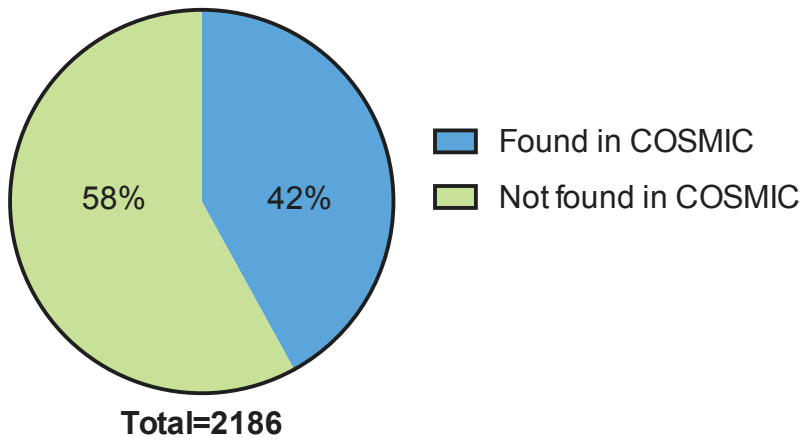



Supplemental Table 1.

| <b>Gene</b> | <b>Potentially Actionable Alterations</b>                     | <b>Potential Therapeutic Implications</b>                                 |
|-------------|---------------------------------------------------------------|---------------------------------------------------------------------------|
| ABL1        | Activating mutations, gene amplification, or BCR-ABL1 fusion  | Treatment with ABL or BCR-ABL inhibitors                                  |
| ABL2        | Activating mutations or gene amplification                    | Treatment with ABL inhibitors                                             |
| AKT1        | Activating mutations or gene amplification                    | Treatment with AKT or mTOR inhibitors                                     |
| AKT2        | Activating mutations or gene amplification                    | Treatment with AKT or mTOR inhibitors                                     |
| AKT3        | Activating mutations or gene amplification                    | Treatment with AKT or mTOR inhibitors                                     |
| ALK         | Activating mutations, gene amplification, or gene fusions     | Treatment with ALK inhibitors                                             |
| AR          | Specific mutations, splicing variants, and gene amplification | Resistance to anti-hormone therapy                                        |
| ARAF        | Activating mutations                                          | Treatment with RAF inhibitor                                              |
| ARID1A      | Loss of ARID1A function mutations or deletion                 | Treatment with PARP inhibitors                                            |
| ATM         | Inactivating mutations or deletions                           | Treatment with PARP inhibitors                                            |
| ATR         | Inactivating mutations or deletions                           | Treatment with PARP inhibitors                                            |
| AURKA       | Activating mutations or gene amplification                    | Treatment with AURKA inhibitors                                           |
| AURKB       | Activating mutations or gene amplification                    | Treatment with AURKB inhibitors                                           |
| AURKC       | Activating mutations or gene amplification                    | Treatment with AURKC inhibitor                                            |
| BAP1        | Inactivating mutations or deletions                           | Treatment with HDAC inhibitors                                            |
| BCL2        | Gene amplification or gene fusion                             | Treatment with BCL2 inhibitor and potential resistance to mTOR inhibitors |
|             | Mutations                                                     | Resistance to BCL2 inhibitor                                              |
| BCR         | Fusion with ABL1                                              | Trials selecting for BCR-ABL fusions                                      |
| BRAF        | Activating V600 mutations                                     | Treatment with BRAF/ MEK/ERK inhibitors                                   |
|             | Activating non-V600 mutations                                 | Treatment with MEK and ERK inhibitors                                     |
|             | Intermediate or inactivating mutations                        | Treatment with pan-RAF or ERK Inhibitors                                  |
|             | Gene amplification                                            | Treatment with MEK, ERK or pan-RAF inhibitors                             |

| <b>Gene</b>  | <b>Potentially Actionable Alterations</b>  | <b>Potential Therapeutic Implications</b>                                                                  |
|--------------|--------------------------------------------|------------------------------------------------------------------------------------------------------------|
|              | Fusions                                    | Treatment with MEK, ERK or pan-RAF inhibitors                                                              |
| BRCA1        | Inactivating mutations or deletions        | Treatment with PARP inhibitors                                                                             |
| BRCA2        | Inactivating mutations or deletions        | Treatment with PARP inhibitors                                                                             |
| CBFB         | Gene fusions                               | Clinical trial selection criteria                                                                          |
| CCND1        | Gene amplification or gene fusion          | Treatment with CDK 4/6 inhibitors                                                                          |
| CCND2        | Gene amplification or gene fusion          | Treatment with CDK 4/6 inhibitors                                                                          |
| CCND3        | Gene amplification or gene fusion          | Treatment with CDK 4/6 inhibitors                                                                          |
| CCNE1        | Gene amplification or gene fusion          | Treatment with CDK 2 Inhibitors                                                                            |
| CDK4         | Activating mutations or gene amplification | Treatment with CDK 4/6 inhibitors                                                                          |
| CDK6         | Activating mutations or gene amplification | Treatment with CDK 4/6 inhibitors                                                                          |
| CDKN1B       | Inactivating mutations or deletions        | Treatment with CDK 2 Inhibitors                                                                            |
| CDKN2A       | Inactivating mutations or deletions        | Treatment with CDK 4/6 inhibitors                                                                          |
| CDKN2B       | Inactivating mutations or deletions        | Treatment with CDK 4/6 inhibitors                                                                          |
| CDKN2C       | Inactivating mutations or deletions        | Treatment with CDK 4/6 inhibitors                                                                          |
| CHEK2        | Activating mutations or gene amplification | Treatment with Chk2 inhibitor                                                                              |
| CSF1R        | Activating mutations or gene amplification | Treatment with CSF1R monoclonal antibody and inhibitors                                                    |
| DDR1         | Activating mutations or gene amplification | Treatment with DDR1 inhibitor                                                                              |
| DDR2         | Activating mutations or gene amplification | Treatment with DDR2 inhibitor                                                                              |
| DNMT3A       | Mutations                                  | Eligibility factor for specific clinical trials recruiting myelodysplastic or myeloproliferative disorders |
| DOT1L        | Activating mutations or gene amplification | Treatment with DOT1L inhibitor                                                                             |
| EGFR         | Activating mutations or gene amplification | Treatment with EGFR inhibitors                                                                             |
| EMSY         | Amplification                              | Treatment with PARP inhibitors                                                                             |
| EPHA3*       | Amplification                              | Treatment with Dasatinib                                                                                   |
| ERBB2 (HER2) | Activating mutations or gene amplification | Treatment with HER2 inhibitors, monoclonal antibodies, and targeted vaccines                               |
| ERBB3 (HER3) | Activating mutations or gene amplification | Treatment with HER3 inhibitors                                                                             |

| <b>Gene</b>  | <b>Potentially Actionable Alterations</b>                 | <b>Potential Therapeutic Implications</b> |
|--------------|-----------------------------------------------------------|-------------------------------------------|
| ERBB4 (HER4) | Activating mutations or gene amplification                | Treatment with HER4 inhibitors            |
| ESR1         | Mutations                                                 | Anti-hormone resistance                   |
| EZH2         | Mutations                                                 | Treatment with EZH2 inhibitors            |
| FANCA        | Loss of function mutation or deletions                    | Clinical trial selection criteria         |
| FANCC        | Loss of function mutation or deletions                    | Clinical trial selection criteria         |
| FANCD2       | Loss of function mutation or deletions                    | Clinical trial selection criteria         |
| FANCE        | Loss of function mutation or deletions                    | Clinical trial selection criteria         |
| FANCF        | Loss of function mutation or deletions                    | Clinical trial selection criteria         |
| FANCG        | Loss of function mutation or deletions                    | Clinical trial selection criteria         |
| FANCL        | Loss of function mutation or deletions                    | Clinical trial selection criteria         |
| FGF3         | Mutations or amplification                                | Clinical trial selection criteria         |
| FGF4         | Mutations or amplification                                | Clinical trial selection criteria         |
| FGF6         | Mutations or amplification                                | Clinical trial selection criteria         |
| FGF10        | Mutations or amplification                                | Clinical trial selection criteria         |
| FGF14        | Mutations or amplification                                | Clinical trial selection criteria         |
| FGF19        | Mutations or amplification                                | Clinical trial selection criteria         |
| FGF23        | Mutations or amplification                                | Clinical trial selection criteria         |
| FGFR1        | Activating mutations, gene amplification, or gene fusions | Treatment with FGFR1 inhibitors           |
| FGFR2        | Activating mutations, gene amplification, or gene fusions | Treatment with FGFR2 inhibitors           |
| FGFR3        | Activating mutations, gene amplification, or gene fusions | Treatment with FGFR3 inhibitors           |
| FGFR4        | Activating mutations or gene amplification                | Treatment with FGFR4 inhibitors           |
| FLT1         | Activating mutations or gene amplification                | Treatment with FLT1 inhibitors            |
| FLT3         | Activating mutations, gene amplification, or gene fusions | Treatment with FLT3 inhibitors            |
| FLT4         | Activating mutations or gene amplification                | Treatment with FLT4 inhibitors            |
| GNA11        | Activating mutations or gene amplification                | Treatment with PKC and MEK inhibitors     |

| <b>Gene</b> | <b>Potentially Actionable Alterations</b>                 | <b>Potential Therapeutic Implications</b>                |
|-------------|-----------------------------------------------------------|----------------------------------------------------------|
| GNAQ        | Activating mutations or gene amplification                | Treatment with PKC and MEK inhibitors                    |
| HDAC9       | Activating mutations or gene amplification                | Treatment with HDAC9 inhibitors                          |
| HGF         | Gene amplification                                        | Treatment HGF monoclonal antibody                        |
| HRAS        | Activating mutations or gene amplification                | Treatment with MEK inhibitors                            |
| IDH1        | Activating mutations                                      | Treatment with IDH1 inhibitors                           |
| IDH2        | Activating mutations                                      | Treatment with IDH2 inhibitors                           |
| IGF1R       | Activating mutations or gene amplification                | Treatment with IGF1R monoclonal antibodies or inhibitors |
| IGF2        | Gene amplification                                        | Treatment with IGF1R monoclonal antibodies or inhibitors |
| JAK1        | Activating mutations or gene amplification                | Treatment with JAK inhibitors                            |
| JAK2        | Activating mutations or gene amplification                | Treatment with JAK inhibitors                            |
| JAK3        | Activating mutations or gene amplification                | Treatment with JAK inhibitors                            |
| KDR         | Activating mutations or gene amplification                | Treatment with KDR inhibitors                            |
| KIT         | Activating mutations or gene amplification                | Treatment with KIT inhibitors                            |
| KRAS        | Activating mutations, gene amplification, or gene fusions | Treatment with MEK Inhibitors                            |
| MAP2K1      | Activating mutations or gene amplification                | Treatment with MEK Inhibitors                            |
| MAP2K2      | Activating mutations or gene amplification                | Treatment with MEK Inhibitors                            |
| MAP2K4      | Activating mutations or gene amplification                | Treatment with JNK1 inhibitor                            |
| MAP3K1      | Activating mutations or gene amplification                | Treatment with JNK1 inhibitor                            |
| MAP3K4      | Activating mutations or gene amplification                | Treatment with JNK1 inhibitor                            |
| MAPK1       | Activating mutations or gene amplification                | Treatment with p38 MAPK1 inhibitor                       |
| MAPK8       | Activating mutations or gene amplification                | Treatment with JNK1 inhibitor                            |

| <b>Gene</b> | <b>Potentially Actionable Alterations</b>                  | <b>Potential Therapeutic Implications</b>                                                                                          |
|-------------|------------------------------------------------------------|------------------------------------------------------------------------------------------------------------------------------------|
| MDM2        | Activating mutations or gene amplification                 | Treatment with MDM2 inhibitor or Nutlins that inhibit MDM2-p53 interaction.                                                        |
| MET         | Activating mutations, gene amplification, or gene fusion   | Treatment with MET inhibitors                                                                                                      |
| MLL (KMT2A) | Gene fusions                                               | Treatment with MEK, VEGFR2, AURKA, and DOT1L inhibitors.                                                                           |
| MPL         | Activating mutations                                       | Treatment with JAK2 inhibitors.                                                                                                    |
| MRE11A      | Loss of function Mutation or Deletions                     | Treatment with PARP inhibitors                                                                                                     |
| MTOR        | Activating mutations or gene amplification                 | Treatment with mTOR inhibitors                                                                                                     |
|             | Selected binding domain mutations                          | Resistance to rapalogs                                                                                                             |
| MYCN        | Gene amplification                                         | Treatment with BET inhibitors                                                                                                      |
| NBN         | Loss of function mutation or deletions                     | Treatment with PARP inhibitors                                                                                                     |
| NF1         | Inactivating mutations or deletions                        | Treatment with PI3K pathway inhibitors (PI3K/AKT/MTOR), MAPK pathway inhibitors (RAF/MEK/ERK), or HSP90 inhibitors                 |
| NF2         | Inactivating mutations or deletions                        | Treatment with PI3K pathway inhibitors (PI3K/AKT/MTOR), MAPK pathway inhibitors (RAF/MEK/ERK), HSP90 inhibitors, or FAK inhibitors |
| NOTCH1      | Activating mutations, gene amplification, or gene fusion   | Treatment with Gamma Secretase inhibitors (GSIs)                                                                                   |
| NOTCH2      | Activating mutations or gene amplification                 | Treatment with Gamma Secretase inhibitors (GSIs)                                                                                   |
|             | Gene fusion                                                | Resistance to Gamma Secretase inhibitors (GSIs)                                                                                    |
| NOTCH3      | Activating mutations or gene amplification, or gene fusion | Treatment with Gamma Secretase inhibitors (GSIs)                                                                                   |
| NOTCH4      | Activating mutations or gene amplification                 | Treatment with Gamma Secretase inhibitors (GSIs)                                                                                   |
| NPM1        | Mutations                                                  | Correlate with positive response to all-trans retinoic acid therapy and chemotherapy in AML.                                       |
| NRAS        | Activating mutations or gene amplification                 | Treatment with MEK inhibitors                                                                                                      |
| NTRK1       | Activating mutations, gene amplification, gene fusions     | Treatment with NTRK1 (TrkA) inhibitor                                                                                              |

| Gene   | Potentially Actionable Alterations                        | Potential Therapeutic Implications                                                                                                                                    |
|--------|-----------------------------------------------------------|-----------------------------------------------------------------------------------------------------------------------------------------------------------------------|
| NTRK2  | Activating mutations or gene amplification                | Treatment with NTRK2 (TrkB) inhibitor                                                                                                                                 |
| NTRK3  | Activating mutations, gene amplification, gene fusions    | Treatment with NTRK3 (TrkC) inhibitor                                                                                                                                 |
| PALB2  | Mutations or homozygous deletion                          | Treatment with PARP inhibitors                                                                                                                                        |
| PDGFB  | Gene fusions                                              | Treatment of DFSP tumors with t(17;22) translocation with Imatinib.                                                                                                   |
| PDGFRA | Activating mutations, gene amplification, or gene fusions | Treatment with PDGFRA inhibitors                                                                                                                                      |
| PDGFRB | Activating mutations, gene amplification, or gene fusions | Treatment with PDGFRB inhibitors                                                                                                                                      |
| PIK3CA | Activating mutations or gene amplification                | Treatment with PI3K, AKT, or mTOR inhibitors                                                                                                                          |
| PIK3CB | Activating mutations or gene amplification                | Treatment with PIK3CB inhibitors                                                                                                                                      |
| PIK3CD | Activating mutations or gene amplification                | Treatment with PIK3CD inhibitors                                                                                                                                      |
| PIK3R1 | Inactivating mutations                                    | Treatment with PI3K, AKT or mTOR inhibitors                                                                                                                           |
| PIK3R2 | Inactivating mutations                                    | Treatment with PI3K, AKT or mTOR inhibitors                                                                                                                           |
| PML    | Gene fusions with RARA                                    | Treatment of PML-RARA tumors with all trans retinoic acid (ATRA) or HDAC inhibitors                                                                                   |
| PTCH1  | Inactivating mutations or deletions                       | Treatment with SMO inhibitors                                                                                                                                         |
| PTEN   | Inactivating mutations or deletions                       | Treatment with p110beta, AKT, or mTOR inhibitors                                                                                                                      |
| PTPN11 | Activating mutations or gene amplification                | Treatment with MEK Inhibitors                                                                                                                                         |
| RAD50  | Inactivating mutations or deletions                       | Treatment with PARP inhibitors                                                                                                                                        |
| RAF1   | Gene amplification                                        | Potential resistance to RAF inhibitors                                                                                                                                |
|        | Gene amplification, activating mutations, or gene fusions | Treatment with MEK inhibitors                                                                                                                                         |
|        | Deletion or loss-of-function mutations                    | Resistance to Dasatinib                                                                                                                                               |
| RARA   | Gene fusions with PML or co-amplification with HER2       | Treatment of ER $\alpha$ (-) breast cancer with HER2/RARA co-amplification with ATRA and anti-HER2 therapy. Treatment of PML-RARA tumors with ATRA or HDAC inhibitors |

| <b>Gene</b> | <b>Potentially Actionable Alterations</b>                 | <b>Potential Therapeutic Implications</b>                                                                                             |
|-------------|-----------------------------------------------------------|---------------------------------------------------------------------------------------------------------------------------------------|
| RET         | Activating mutations, gene amplification, or gene fusions | Treatment with Ret inhibitors                                                                                                         |
| RNF43       | Inactivating Mutations and Gene Deletions                 | Treatment to Porcupine inhibitors and selection criteria for trial enrollment                                                         |
| RICTOR      | Activating mutations or gene amplification                | Treatment with AKT or mTORC2 inhibitors                                                                                               |
| ROS1        | Gene fusions                                              | Treatment with Crizotinib or ROS1/ALK inhibitor, PF-06463922                                                                          |
|             | Mutations, Amplification, and Gene Fusion                 | Clinical trial selection criteria                                                                                                     |
| RSPO        | Gene fusions                                              | Sensitivity to Wnt signaling inhibitor and selection criteria for trial enrollment                                                    |
| RUNX1       | Gene fusions                                              | Trials selecting for RUNX1 gene fusions. Treatment with AML1(RUNX1)-ETO chemical inhibitors, corticosteroids, and methylprednisolone. |
| SMARCB1     | Loss of function mutation or deletions                    | Clinical trial selection criteria                                                                                                     |
| SDHA        | Loss of function mutation or deletions                    | Clinical trial selection criteria                                                                                                     |
| SDHB        | Loss of function mutation or deletions                    | Clinical trial selection criteria                                                                                                     |
| SDHC        | Loss of function mutation or deletions                    | Clinical trial selection criteria                                                                                                     |
| SDHD        | Loss of function mutation or deletions                    | Clinical trial selection criteria                                                                                                     |
| SMO         | Activating mutations or gene amplification                | Treatment with SMO inhibitors                                                                                                         |
| SRC         | Activating mutations or gene amplification                | Treatment with SRC inhibitors                                                                                                         |
| STK11       | Inactivating mutations or deletions                       | Treatment with mTOR inhibitors or AMPK activators                                                                                     |
| SYK         | Activating mutations or gene amplification                | Treatment with Syk inhibitors                                                                                                         |
| TET2        | Mutations                                                 | "High risk" factor of myelodysplastic or myeloproliferative disorders required for trial enrollment.                                  |

| <b>Gene</b> | <b>Potentially Actionable Alterations</b> | <b>Potential Therapeutic Implications</b>  |
|-------------|-------------------------------------------|--------------------------------------------|
| TOP2A       | Copy number changes                       | Treatment with topoisomerase 2A inhibitors |
| TSC1        | Inactivating mutations or deletions       | Treatment with mTOR inhibitors             |
| TSC2        | Inactivating mutations or deletions       | Treatment with mTOR inhibitors             |
